# Supplementary material
Source: HighWire-hosted journal article supplement (https://bmjopen.bmj.com/content/7/1/e013562)
Supplement: inline-supplementary-material-1 [file inline-supplementary-material-1.pdf]

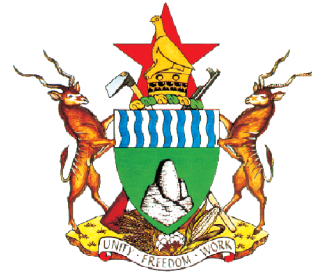

REPUBLIC OF ZIMBABWE

MINISTRY OF HEALTH AND CHILD CARE

VOLUNTARY MEDICAL MALE CIRCUMCISION:  
**CLIENT INTAKE FORM**

PROVINCE: ..... PROVINCE CODE: .....

DISTRICT: ..... DISTRICT CODE: .....

FACILITY NAME: ..... FACILITY CODE: .....

PERIOD: FROM ..... TO .....

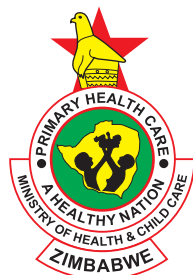

*Revised April 2014*

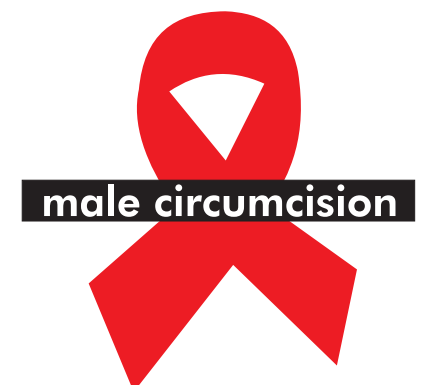

VOLUNTARY MEDICAL MALE CIRCUMCISION CLIENT INTAKE FORM

VMMC Client Number (year-M-5 digit number): Date of Visit: Facility: Facility Code: District: Province:

PERSONAL DETAILS

Client's Name:

D.O.B: Age: years months

National ID:

Client's Physical Address (Residence/Village):

Client Tel: Home: Mobile: Work:

Alternate Address: Work School Friend/next of kin

Alternate Tel:

Address:

Name of friend/next of kin:

FACILITY

Type of Site/Service (tick appropriate):

Static site Outreach/Mobile site: Name/location:

How did client learn about the service? (Tick all that apply)

Friend/family Other client Partner/Spouse Community mobiliser Health worker Television(TV) Poster Radio Newspaper Leaflet Other (Specify)

Referred from: (Tick all that apply)

New Start Centre School Community mobiliser HTC program Workplace Health worker Other (Specify)

INDIVIDUAL COUNSELING

Primary reason for circumcision: (Tick all that apply)

Partial HIV protection Appearance Sexual pleasure Hygiene STI protection Cultural/social Medical Religious Other (Specify)

Has client been tested for HIV before?

If Yes, when? -Recently, less than one month ago -Between 1 month and 3 months ago -More than 3 months ago -Other, indicate

If tested before, What was the result:

If tested before, provide Referral Form / Proof of test

HIV test done for VMMC:

HIV test result

If HIV test positive: WHO clinical stage:

If HIV test positive: CD4 cell count, if known:

Have you ever been diagnosed with any of the following?

Anaemia Peripheral vascular disease Cancer Hypertension Bleeding disorder Diabetes mellitus Other (specify):

Family history of abnormal bleeding/known clotting disorder?

MEDICAL SCREENING/PHYSICAL EXAMINATION

Vital signs:

Weight (kg) Temperature °C Blood Pressure / mmHg Pulse b/min

Any known allergies? Yes No

If yes, specify:

Are you currently taking any medications? Yes No

If yes, specify:

Have you ever had an operation? Yes No

If yes, specify:

General condition:

Ill looking Yes No Lymphadenopathy Yes No Jaundice Yes No Healthy Yes No Wasting Yes No Pallor Yes No Dehydration Yes No Other (specify):

Do you have any of the following complaints?

Pain on urination Yes No Difficulty in retracting the foreskin Yes No Painful/weak erection Yes No Urethral discharge Yes No Other (specify): Swelling of the scrotum Yes No Genital sore Yes No

Genital Exam: Any of the following?

Torsion of the penis Yes No Posthitis Yes No Hypospadias Yes No Preputial Adhesions Yes No Urethral discharge Yes No Genital Ulcers Yes No Phimosis Yes No Others (describe): Genital warts Yes No Paraphimosis Yes No Balanitis Yes No Epispadias Yes No

CIRCUMCISION METHOD ELIGIBILITY

For adults ages 18 and over:

Informed Consent Granted Yes No , clinician's initials:

For minors under age 18:

Parental/guardian signature : Yes No , clinician's initials:

How was verification of consent with parent/guardian obtained?

Telephone Visit Mail Other (specify)

Client is eligible for which circumcision method (Tick all applicable)

Surgical circumcision PrePex circumcision Other (specify)

Of the appropriate methods, the circumcision method chosen by client

Surgical circumcision PrePex circumcision Other (specify)

CIRCUMCISION PROCEDURE:

Date of Procedure/Device Placement:

Circumciser's Name: Doctor Nurse Other (specify)

Assistant's Name: Doctor Nurse Other (specify)

For Surgical Male Circumcision:

Procedure Type:

Forceps-guided Other (specify)

Anaesthesia:

Local anaesthetic: (circle type and fill in dose)

1% lignocaine mls 2% lignocaine mls 0.5% Bupivacaine mls

Diathermy used Yes No

If yes; Settings

Procedure start time: Procedure end time:

For PrePex Male Circumcision:

Device Size

Device Batch ID #:

Device Expiry Date: Time

Topical anaesthesia: Yes No

If Yes, Specify:

Clinical Notes:

Adverse Events (AEs) During Procedure

Client had NO adverse event(s) diagnosed during MC procedure/placement visit (skip to post-procedure assessment)

Client had adverse event(s) diagnosed during MC procedure/placement visit (prior to discharge):

Mild Moderate Severe

Pain (A-PA)

Bleeding (A-BL)

Anaesthetic-related problem (A-AN)

Damage to penis (A-SD)

Excess skin removal (A-SD)

Difficulty with placement (A-DP)

Device malfunction (A-DM)

If any AEs occurred, describe AE management:

Post-Procedural Assessment (before discharge)

Vital signs:

Blood Pressure / mmHg

Pulse b/min

Analgesia given:

Yes, Drug: No

General condition:

Date of next scheduled visit:

Discharged by:

Signature:

Dressing or PrePex device appropriately placed:

Yes No

Client provided post-procedure written instructions:

Yes No

Client given MC Client Card and instructed to return for next follow-up visit:

Yes No

Day 2: Post-circumcision visit(Surgical)

Date:

Visit interval: Before (Bf) On time (OT) Late (Late)

Name of nurse/doctor:

Any Adverse Event at this visit? Yes No

If Yes:

Severity

AE code Mild Moderate Severe

Comments/Management:

Day 7: Device removal

Date:

Visit interval: Before (Bf) On time (OT) Late (Late)

Name of nurse/doctor:

Any Adverse Event at this visit? Yes No

If Yes:

Severity

AE code Mild Moderate Severe

Day 7: Post-circumcision visit

Date:

Visit interval: Before (Bf) On time (OT) Late (Late)

Name of nurse/doctor:

Any Adverse Event at this visit? Yes No

If Yes:

Severity

AE code Mild Moderate Severe

Comments/Management:

Day 14: Post-device placement visit

Date:

Visit interval: Before (Bf) On time (OT) Late (Late)

Name of nurse/doctor:

Any Adverse Event at this visit? Yes No

If Yes:

Severity

AE code Mild Moderate Severe

Additional review: If applicable

Date:

Name of nurse/doctor:

Any Adverse Event at this visit? Yes No

If Yes:

Severity

AE code Mild Moderate Severe

Comments/Management:

Day 42: Post-circumcision visit

Date:

Visit interval: Before (Bf) On time (OT) Late (Late)

Name of nurse/doctor:

Any Adverse Event at this visit? Yes No

If Yes:

Severity

AE code Mild Moderate Severe

Wound healing complete? Yes No

If No, additional visit date:

Resumed sexual activity Yes No

If yes, number of weeks weeks

Counseled to reduce sexual risk Yes No

If yes; Risk reduction plan (Tick all applicable):

None Decrease number of sex partners Dual Protection Abstinence Use condoms Monogamy Other (specify)

Day 49: Post-device placement visit

Date:

Visit interval: Before (Bf) On time (OT) Late (Late)

Name of nurse/doctor:

Any Adverse Event at this visit? Yes No

If Yes:

Severity

AE code Mild Moderate Severe

Wound healing complete? Yes No

If No, additional visit date:

Resumed sexual activity Yes No

If yes, number of weeks weeks

Counseled to reduce sexual risk Yes No

If yes; Risk reduction plan (Tick all applicable):

None Decrease number of sex partners Dual Protection Abstinence Use condoms Monogamy Other (specify)

Additional clinical management of Adverse Events or additional comments/notes:
